# Supplementary material for: Prescription of Psychiatric Medications and Polypharmacy in the LAMS Cohort
Source: Atypon-hosted journal article supplement (doi:10.1176/appi.ps.201200507), 2013-07-15
Supplement: 1026_ds001.pdf [file 1026_ds001.pdf]

**Type of prescriber by medication group (N = 436 cases taking any psychotropic medication)**

| <b>Medication Group<br/>at Baseline</b> | <b>Prescriber Frequency<br/>(% within group)</b> |                                         |                      |
|-----------------------------------------|--------------------------------------------------|-----------------------------------------|----------------------|
|                                         | <b>Psychiatrist</b>                              | <b>Pediatrician/Family<br/>Medicine</b> | <b>Other/Unknown</b> |
| <b># of Medications</b>                 |                                                  |                                         |                      |
| 1                                       | 135 (57%)                                        | 79 (33%)                                | 24 (10%)             |
| 2                                       | 83 (62%)                                         | 38 (28%)                                | 13 (10%)             |
| 3 or More                               | 52 (73%)                                         | 13 (18%)                                | 6 (8%)               |

Note:  $\chi^2$  (df=4) = 6.48, p=0.166
